# Supplementary material for: QCM-Based HCl Gas Sensors Using Spin-Coated Aminated Polystyrene Colloids
Source: Polymers (Basel). 2020 Jul 17;12(7):1591. doi: 10.3390/polym12071591 (PMC7408365; doi:10.3390/polym12071591)
Supplement: Supplementary file 1 [file polymers-12-01591-s001.pdf]

# Supporting Information

## QCM-Based HCl Gas Sensors Using Spin-Coated Aminated Polystyrene Colloids

Young-Jae Jin<sup>1</sup> and Jinyoung Park<sup>1,2,\*</sup>

<sup>1</sup>*School of Applied Chemical Engineering, Kyungpook National University, 80 Daehak-ro, Buk-gu, Daegu 41566, Republic of Korea*

<sup>2</sup>*Department of Polymer Science & Engineering, Kyungpook National University, 80 Daehak-ro, Buk-gu, Daegu 41566, Republic of Korea*

\* Correspondence: jinpark@knu.ac.kr (J.P.);  
Tel.: +82-53-950-5624 (J.P.)

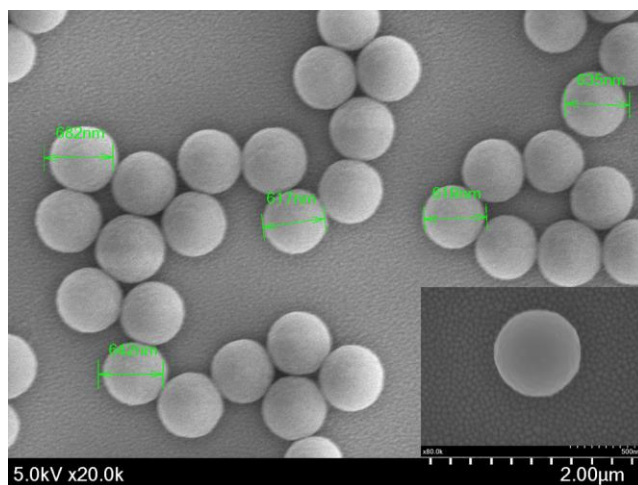

**Figure S1.** SEM images of the pristine PS colloidal beads.

**Table S1.** Nitration of PS colloidal beads using a mixture solution of H<sub>2</sub>SO<sub>4</sub> and HNO<sub>3</sub> (v/v).

| Samples           | H <sub>2</sub> SO <sub>4</sub> /HNO <sub>3</sub><br>(v/v) | Input<br>(g) | Yield<br>(g) | Yield ratio | Degree of nitration<br>(DN) |
|-------------------|-----------------------------------------------------------|--------------|--------------|-------------|-----------------------------|
| <i>n</i> -PS(0.4) | 0.4                                                       | 0.2          | 0.205        | 1.025       | 0.05869                     |
| <i>n</i> -PS(0.6) | 0.6                                                       | 0.2          | 0.223        | 1.115       | 0.26995                     |
| <i>n</i> -PS(0.8) | 0.8                                                       | 0.2          | 0.259        | 1.295       | 0.69249                     |
| <i>n</i> -PS(1.0) | 1.0                                                       | 0.2          | 0.287        | 1.435       | 1.02113                     |
| <i>n</i> -PS(1.2) | 1.2                                                       | 0.2          | 0.285        | 1.425       | 0.99765                     |

a) Styrene (repeating unit: 105.18 g/mol) and nitrated styrene (repeating unit: 150.06 g/mol)

b) Yield ratio (g/g) = 150.06/105.18 = 1.426 if the substitution ratio is 1.

c) Degree of nitration (DN) = (yield ratio – 1)/0.426

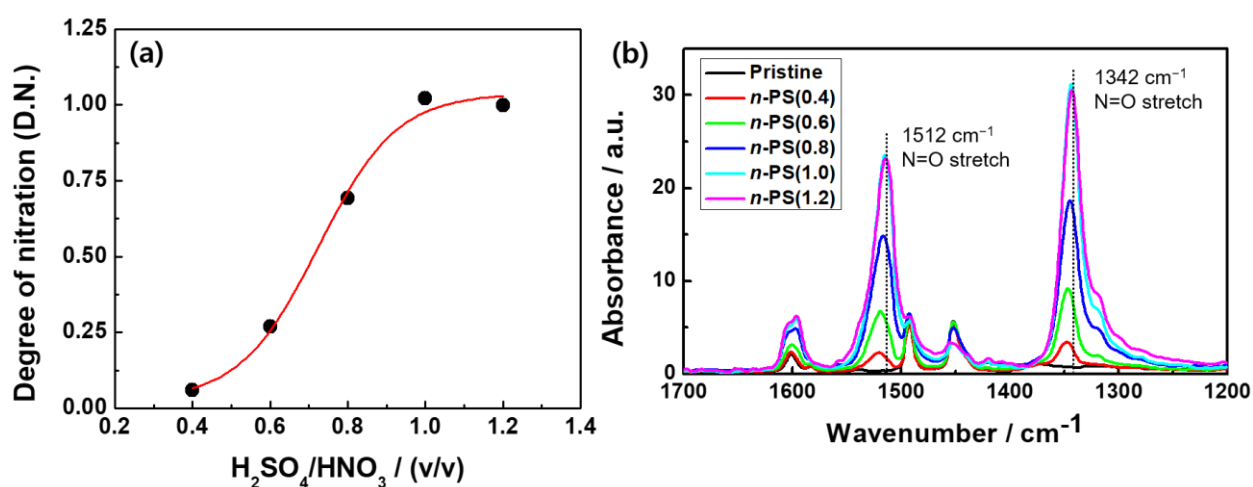

**Figure S2.** (a) Degree of nitration (DN) as a function of H<sub>2</sub>SO<sub>4</sub>/HNO<sub>3</sub> (v/v) and (b) FT-IR spectra of the nitrated PS (*n*-PS) colloids with five different DN values, including pristine PS (*p*-PS) colloids.

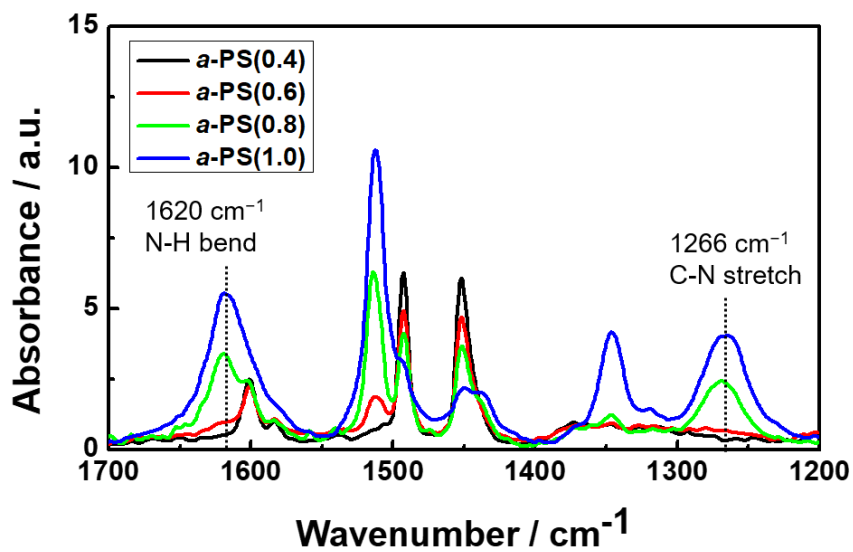

**Figure S3.** FT-IR spectra of the aminated PS (*a*-PS) colloids with four different DN values.

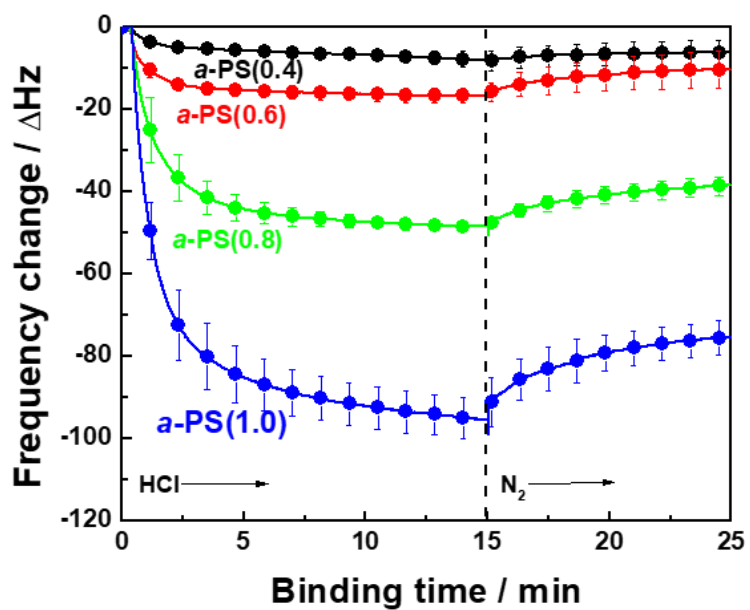

**Figure S4.** Frequency change ( $\Delta f$ ) as a function of time on four different *a*-PS colloid sensors ( $\Delta m = 1 \mu\text{g}$ ) in case of a 100-ppm HCl gas flow for the 15-min adsorption and 10-min desorption processes ( $n = 3$ ).

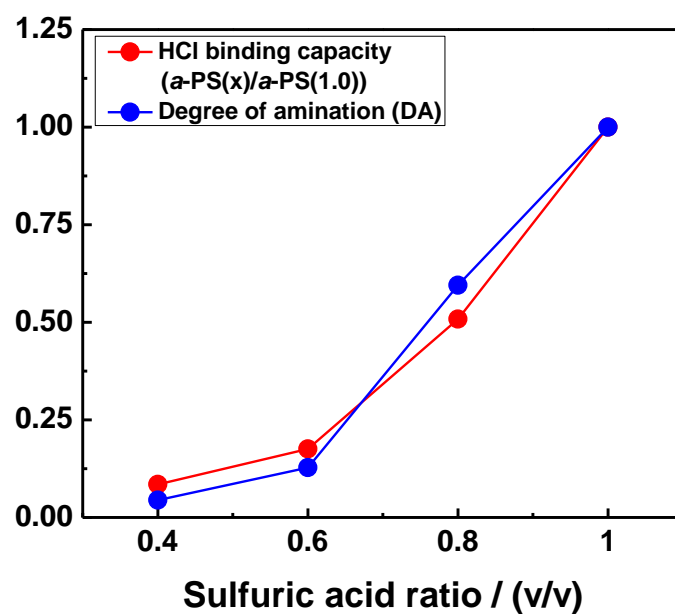

**Figure S5.** The correlation of HCl binding capacity with degree of amination. The ratio of HCl binding capacity was calculated from  $a\text{-PS}(x)/a\text{-PS}(1.0)$  and the ratio of degree of amination was obtained by calculating  $(A_{a\text{-PS}(x)} - A_{\text{pristine}}) / (A_{a\text{-PS}(1.0)} - A_{\text{pristine}})$  from absorbance intensity of FT-IR at a peak of  $1620\text{ cm}^{-1}$ .

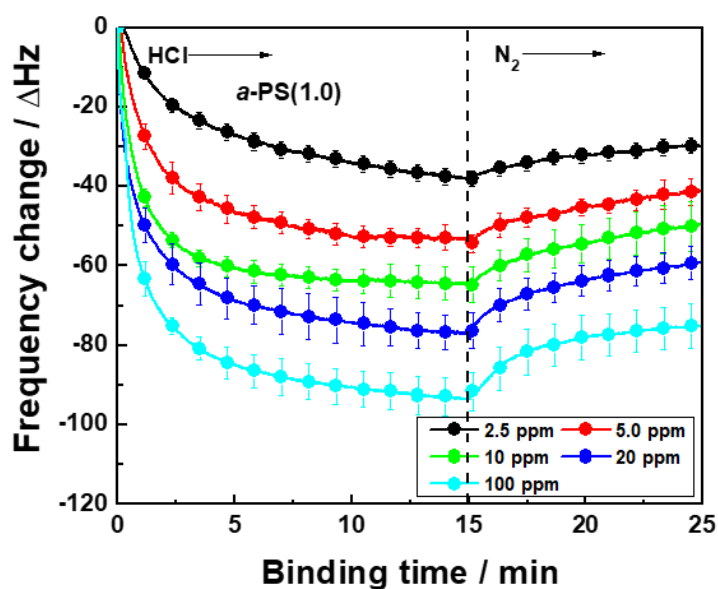

**Figure S6.** Frequency change ( $\Delta f$ ) as a function of time on the  $a\text{-PS}(1.0)$  colloid sensor ( $\Delta m = 1\text{ }\mu\text{g}$ ) under an initial HCl gas flow (2.5–100 ppm) ( $n = 3$ ) for the 15-min adsorption and 10-min desorption processes ( $n = 3$ ).

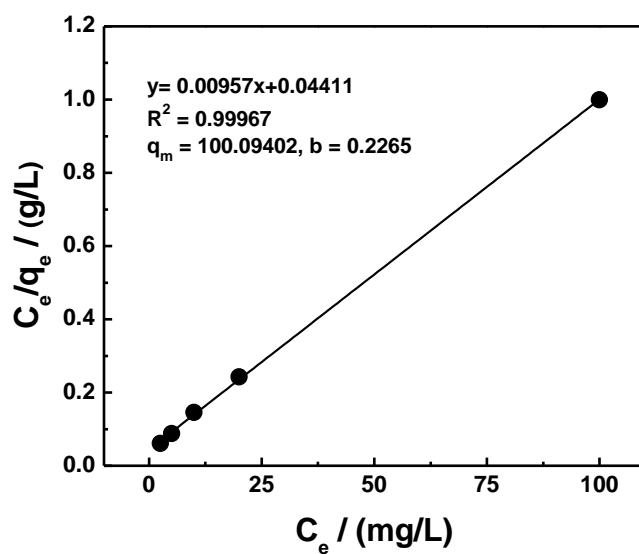

**Figure S7.** Langmuir isotherm for the adsorption of *a*-PS(1.0). Langmuir isotherm equation ( $C_e/Q_e = 1/(bQ_m) + C_e/Q_m$ ) was used, where  $q_e$  (mg/g) and  $q_m$  (mg/g) are the maximum and equilibrium adsorption capacity of the HCl gas, respectively;  $b$  (L/mg) is the adsorption equilibrium constant; and  $C_e$  (mg/L) is the equilibrium concentration (mg/L).

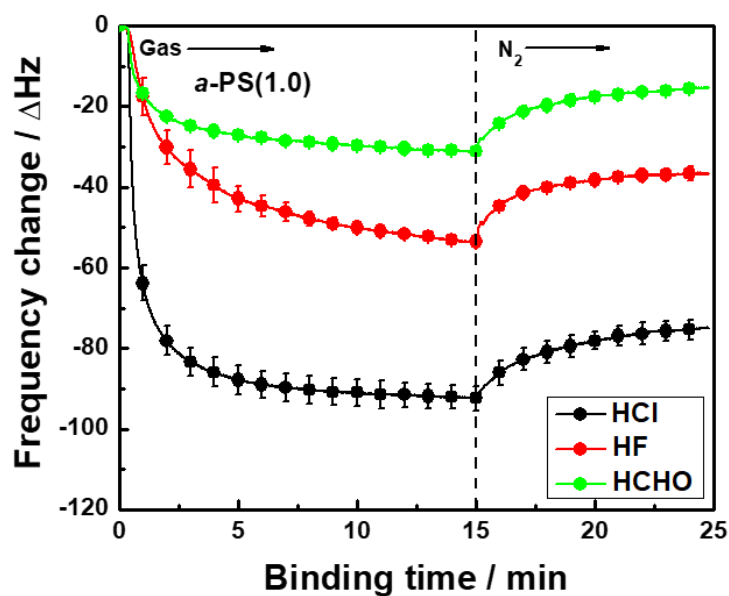

**Figure S8.** Frequency change ( $\Delta f$ ) as a function of time on the *a*-PS colloid sensor ( $\Delta m = 1 \mu\text{g}$ ) for the HCl, HF, and HCHO gases at a fixed concentration (100 ppm) for the 15-min adsorption and 10-min desorption processes ( $n = 3$ ).
